# Supplementary material
Source: Research Square preprint supplement (doi:10.21203/rs.3.rs-8146187/v1)

# Full and uncropped western blot

Fig 3E

PP65 →

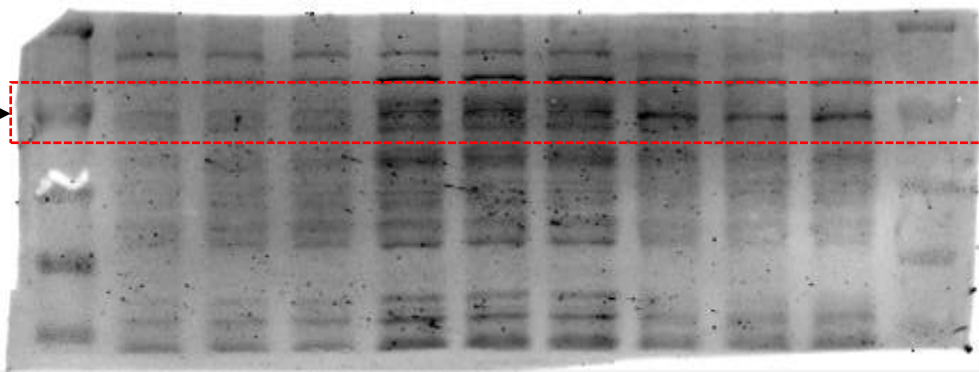

P65 →

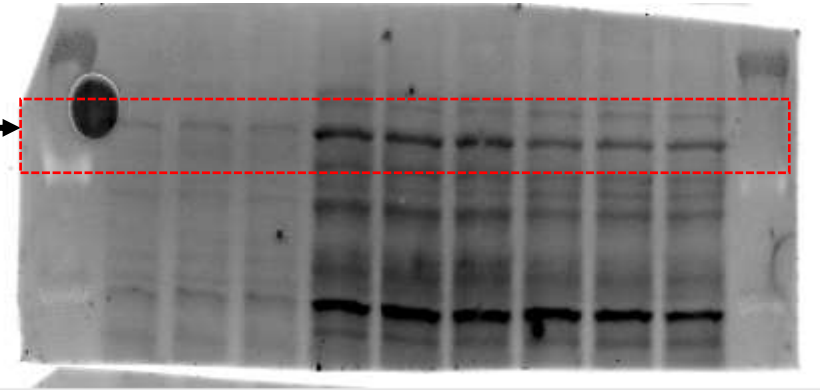

Kim-1 →

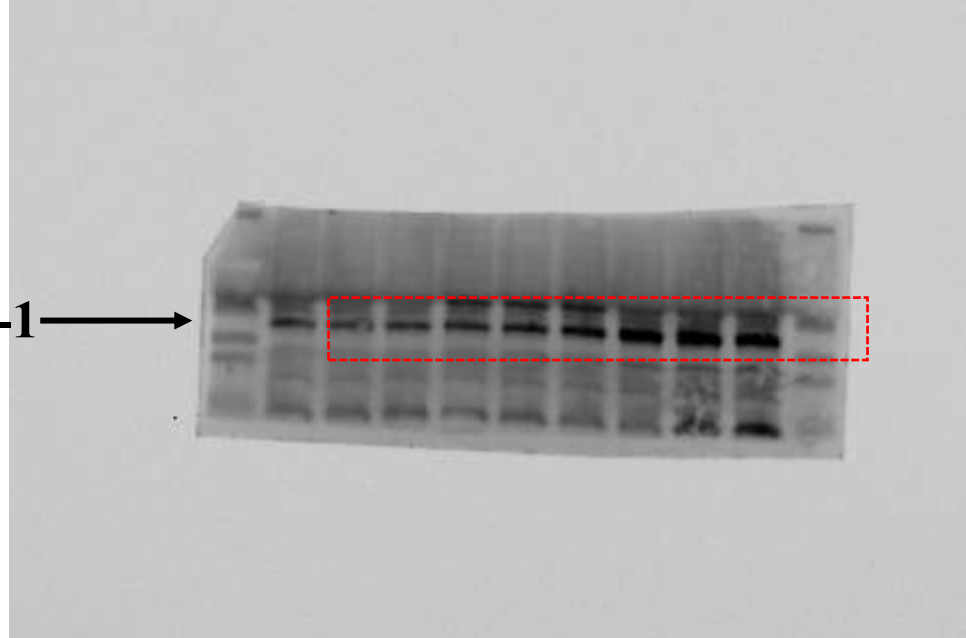

$\beta$ -Actin →

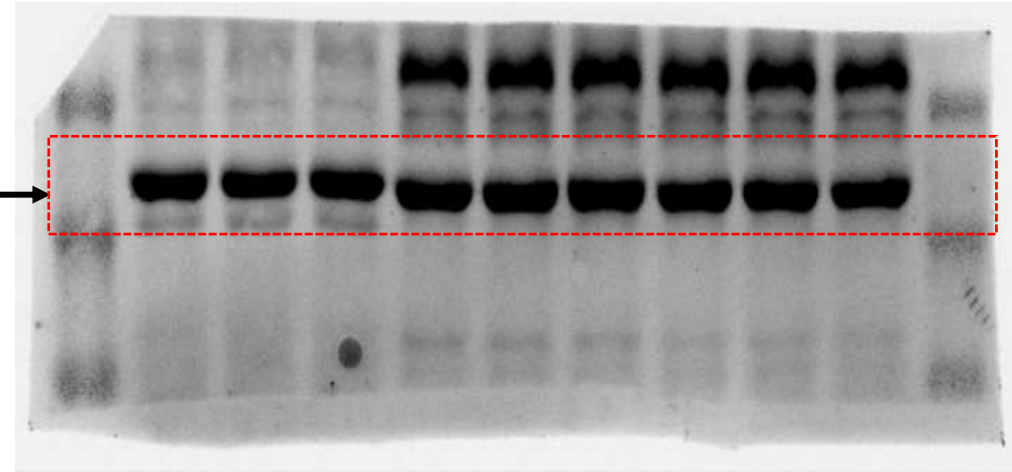

# Full and uncropped western blot

Fig 4C

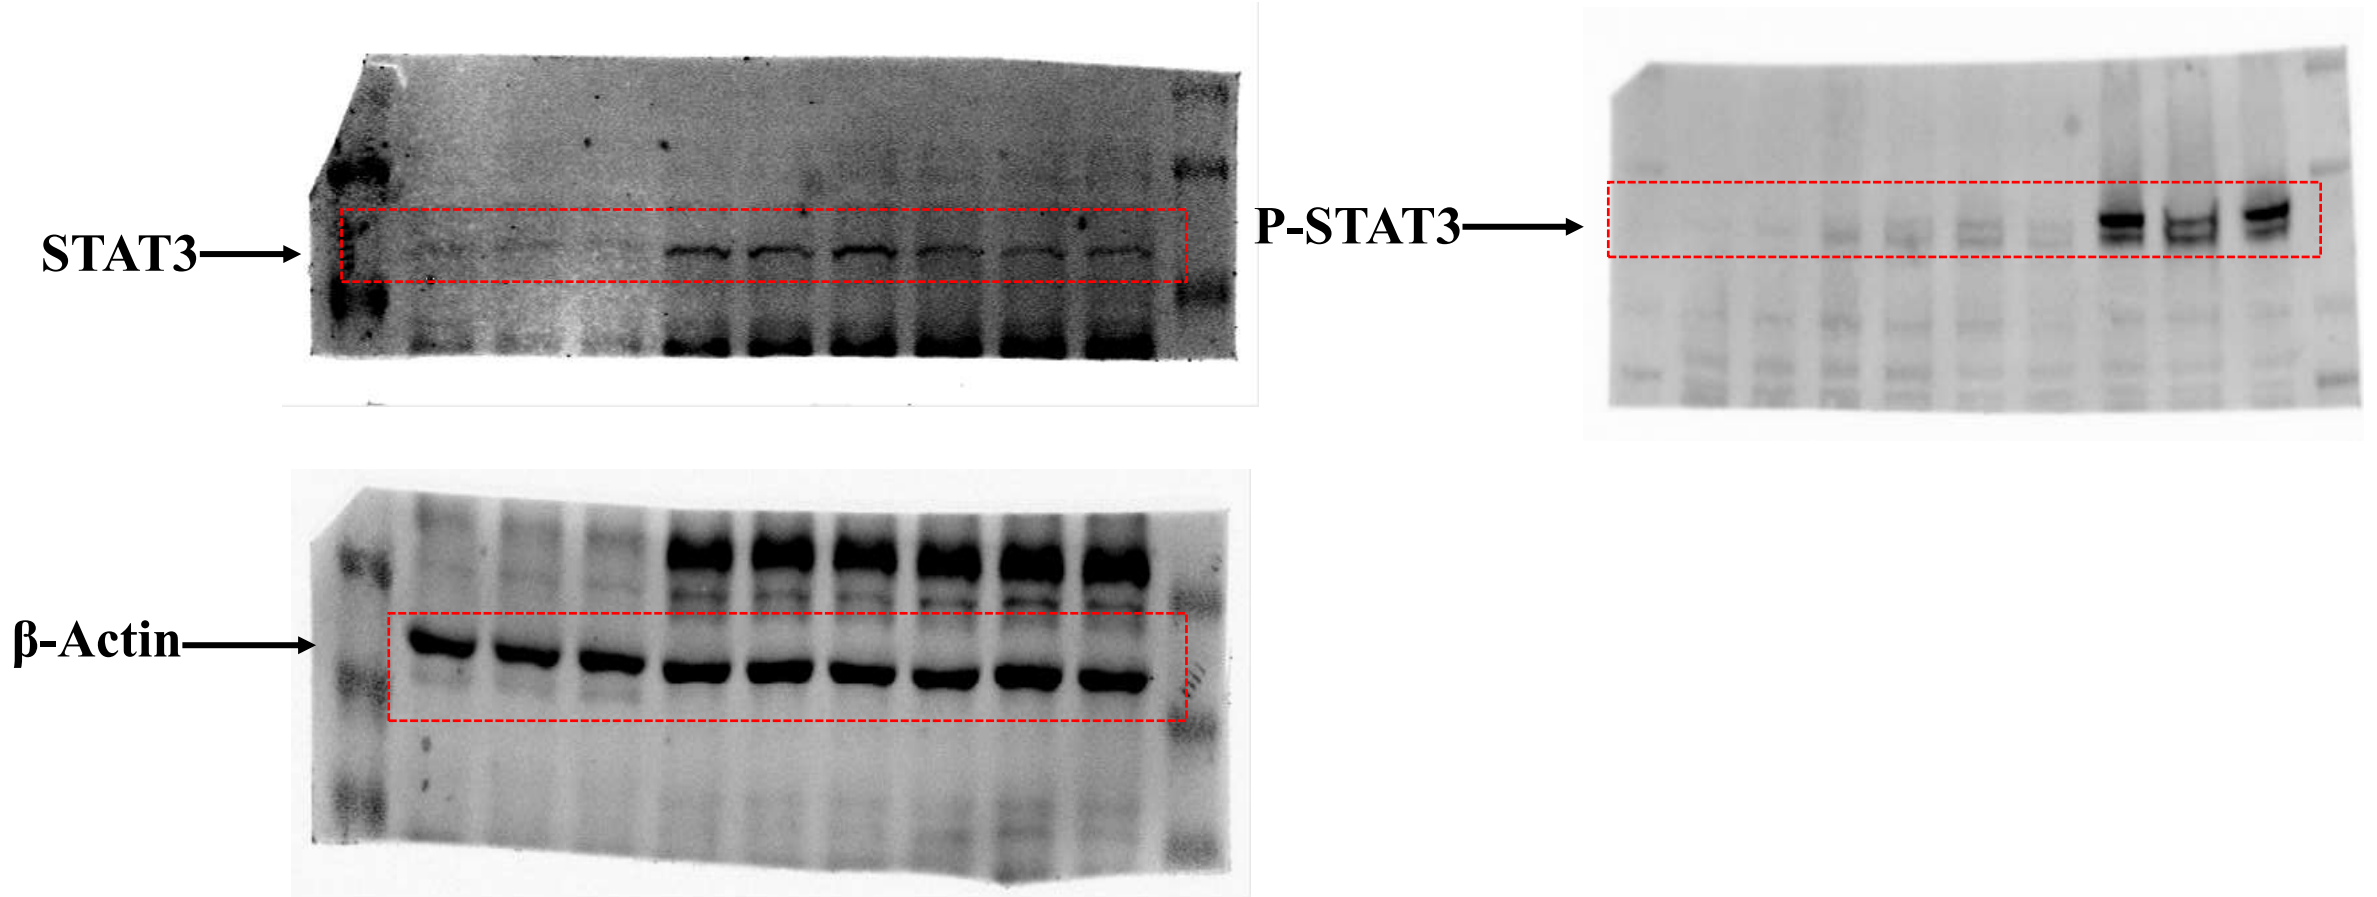

# Full and uncropped western blot

Fig 4F

Kim-1 →

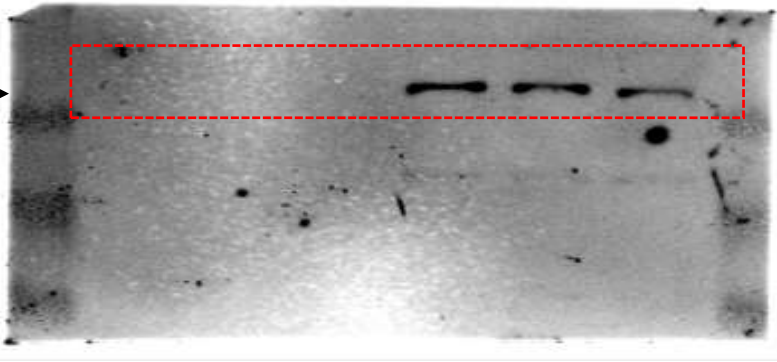

P-STAT3 →

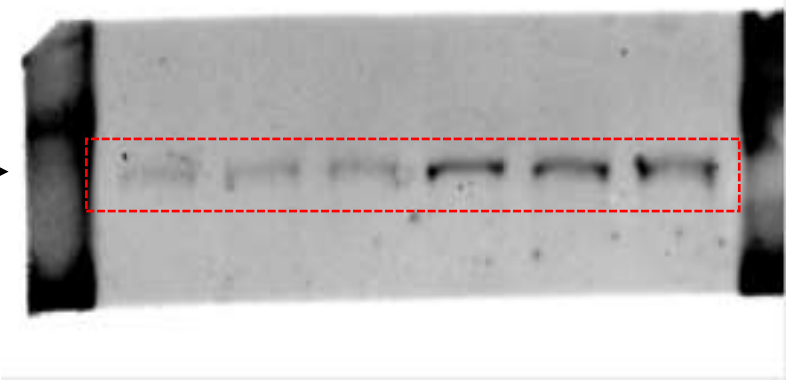

STAT3 →

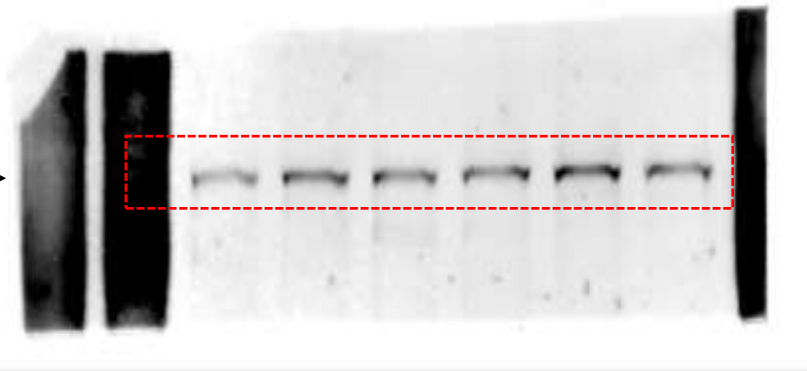

β-Actin →

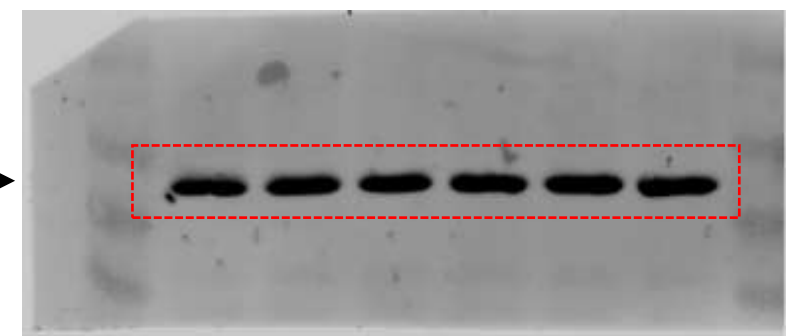

# Full and uncropped western blot

Fig 5E

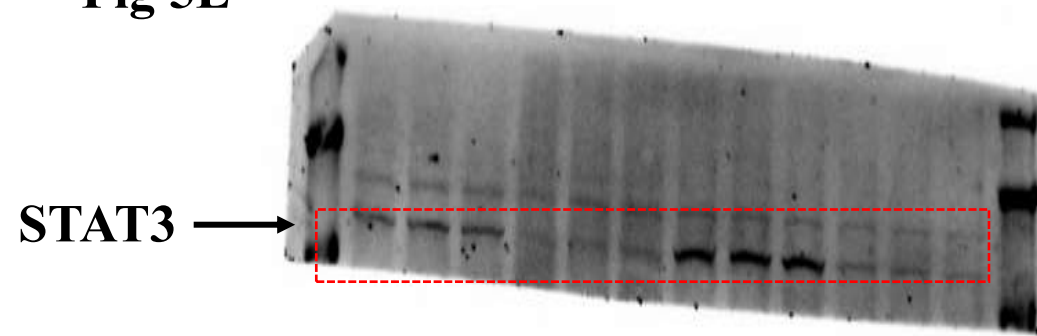

Cleaved-caspase3 →

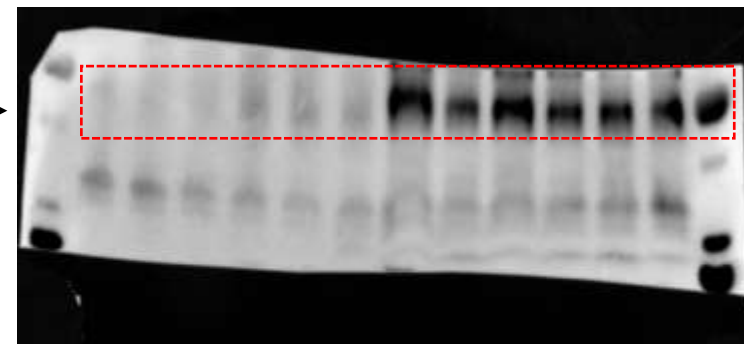

Kim-1 →

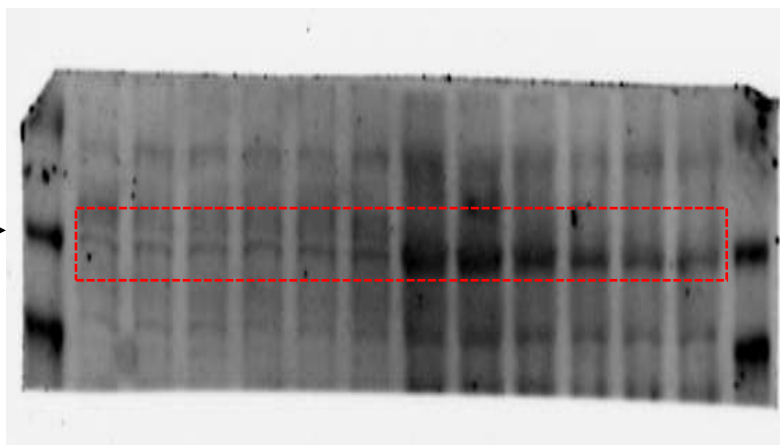

β-Actin →

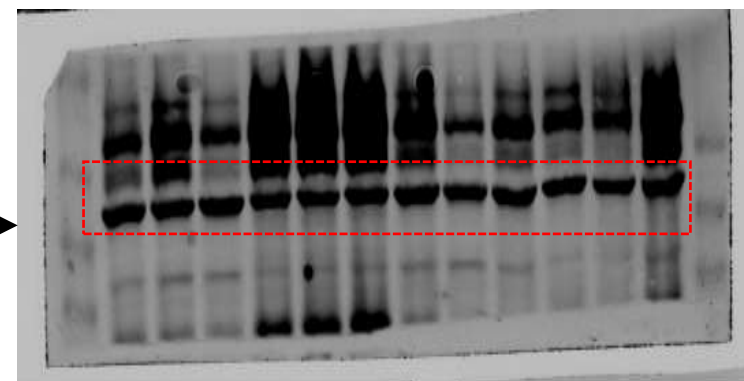

# Full and uncropped western blot

Fig 6B

STAT3 →

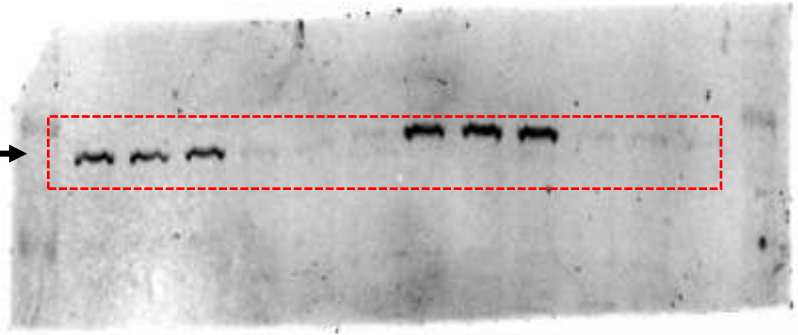

Kim-1 →

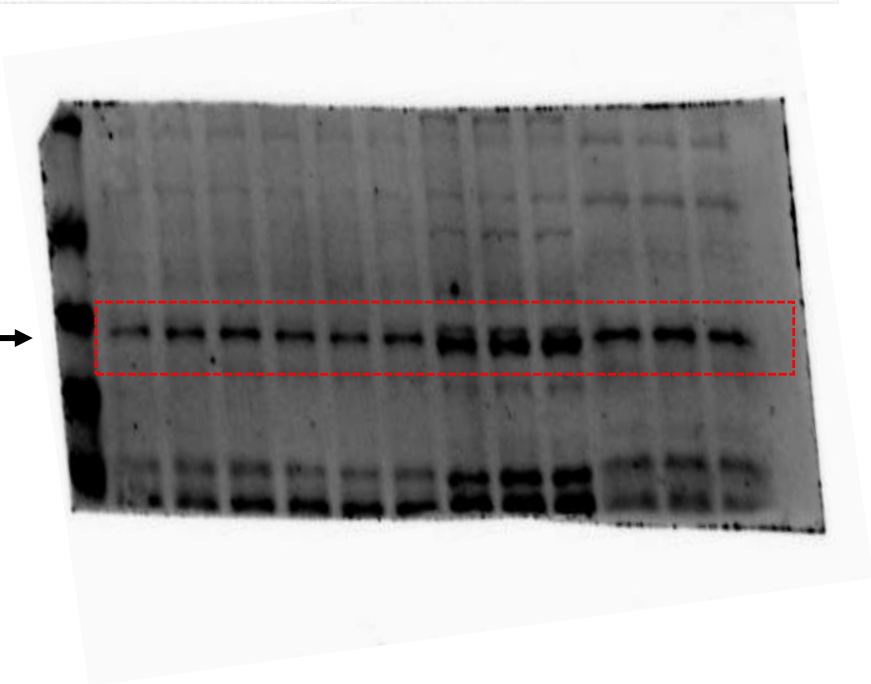

β-Actin →

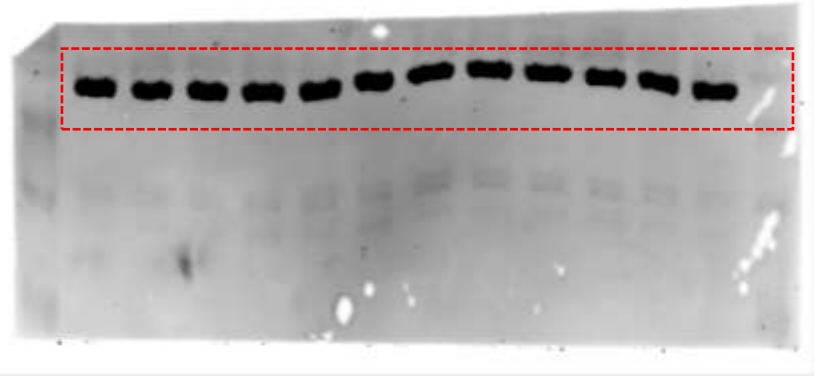

# Full and uncropped western blot

Fig 6G

STAT3 →

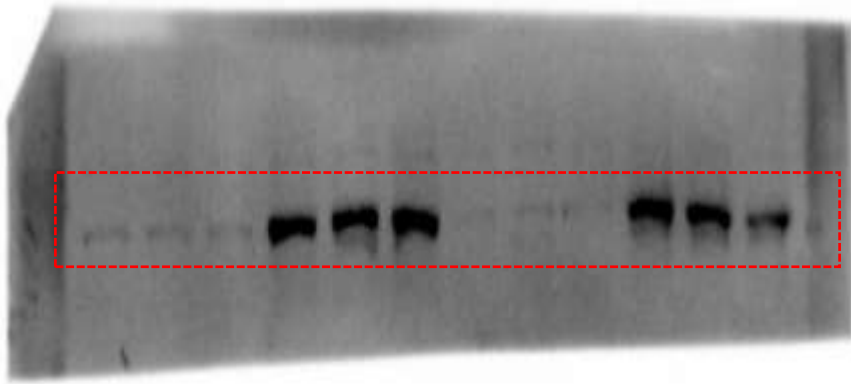

Kim-1 →

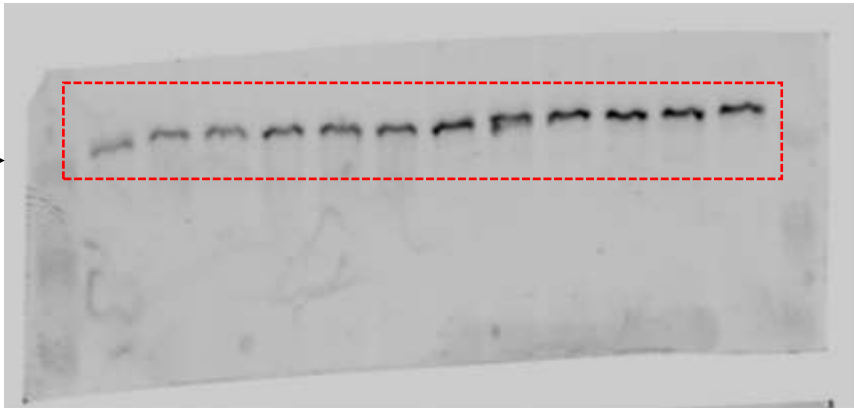

$\beta$ -Actin →

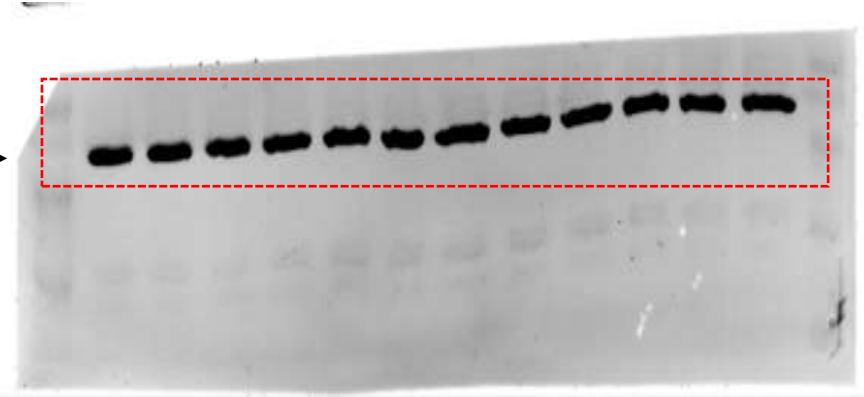

PP65 →

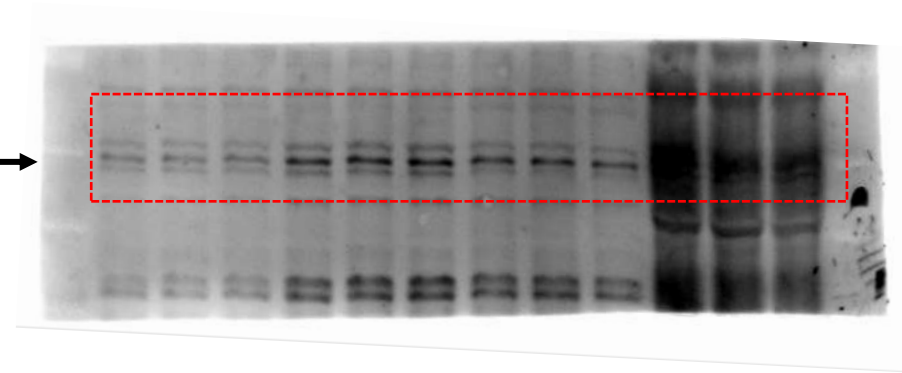

P65 →

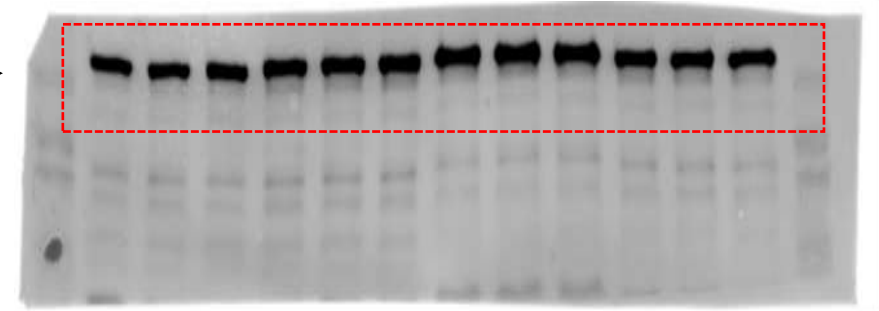

# Full and uncropped western blot

Fig 7A

FL-GSDME →

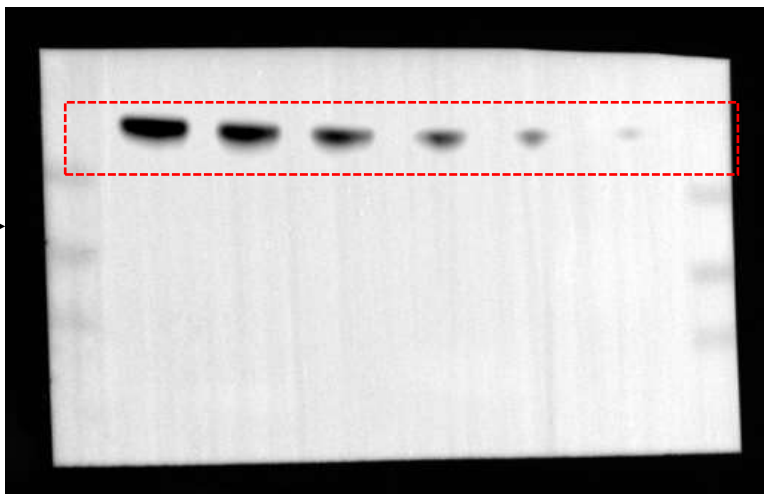

β-Actin →

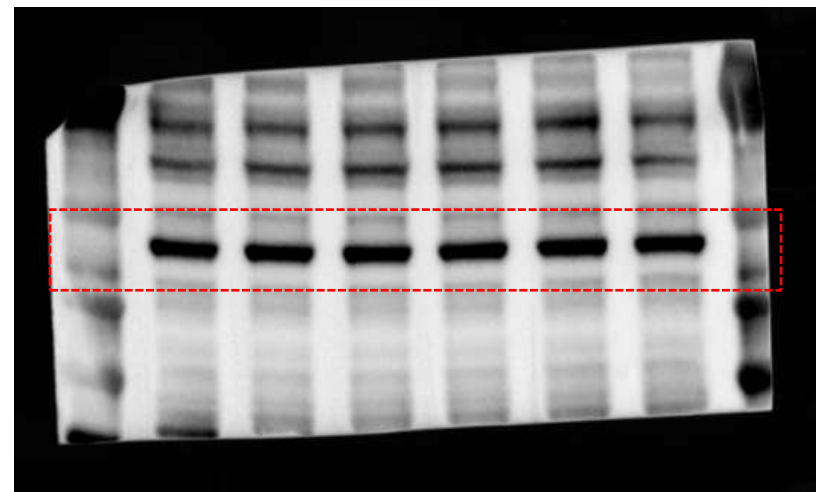

FL-GSDME →

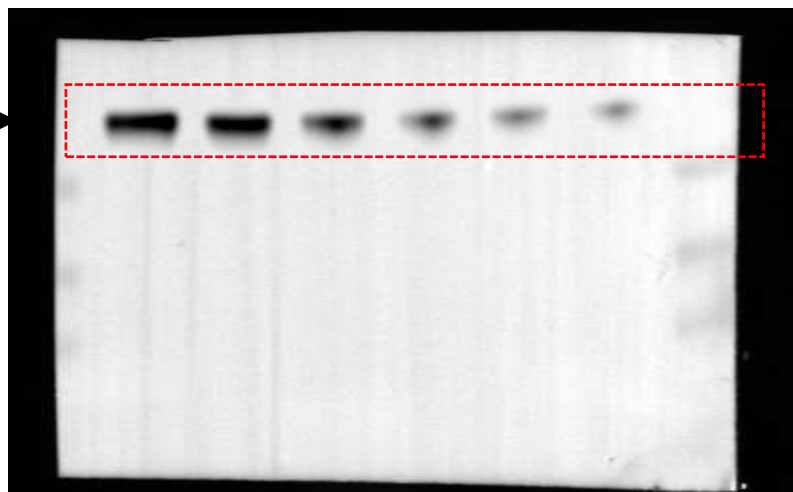

β-Actin →

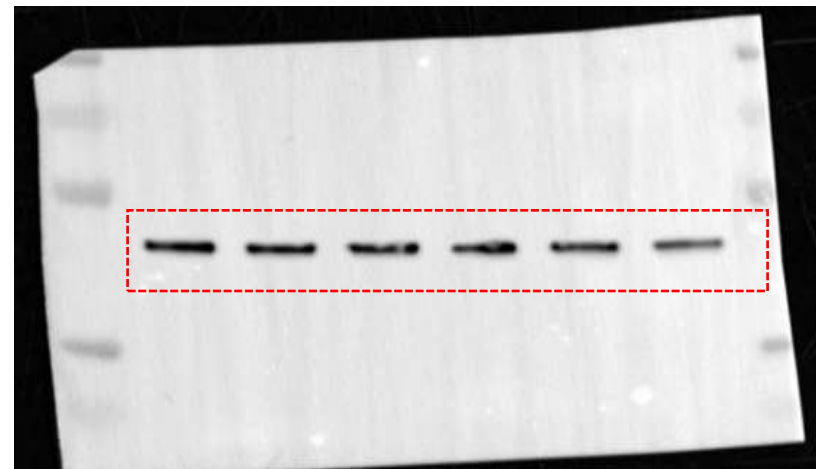

# Full and uncropped western blot

Fig 7F

FL-GSDME →

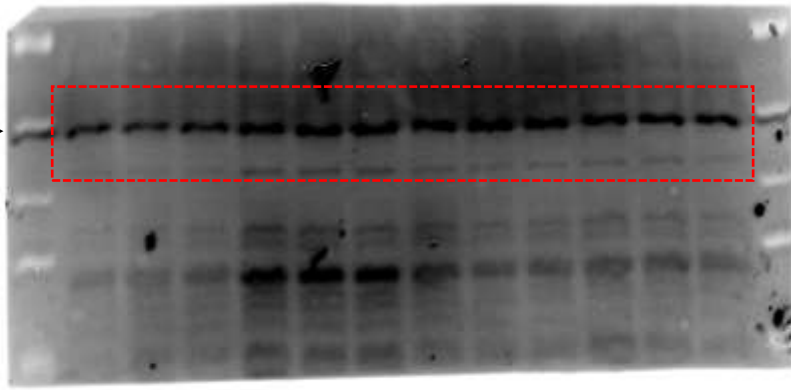

β-Actin →

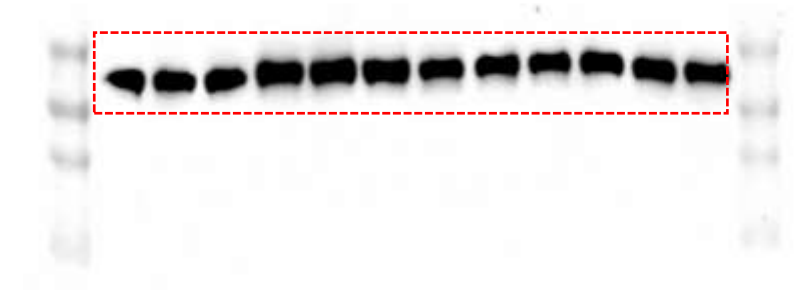

GSDME-N →

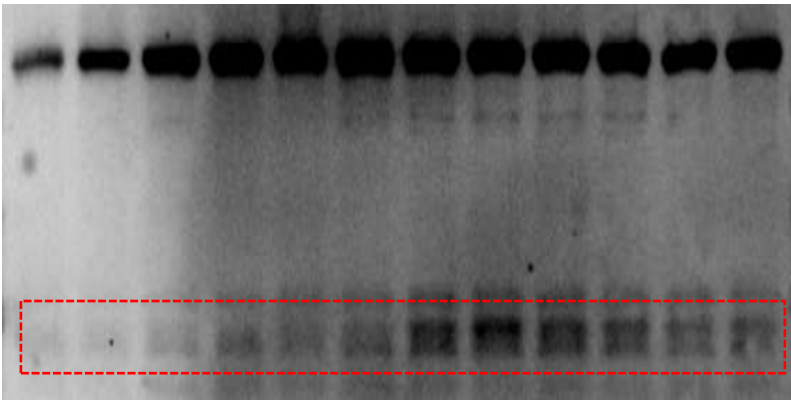

# Full and uncropped western blot

Fig 7G

FL-GSDME →

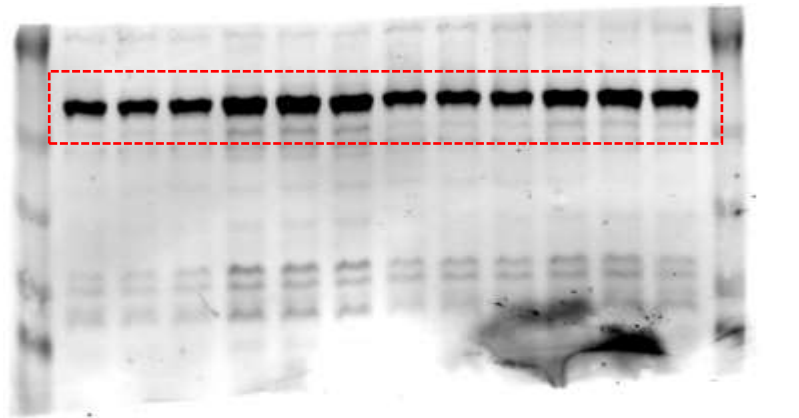

β-Actin →

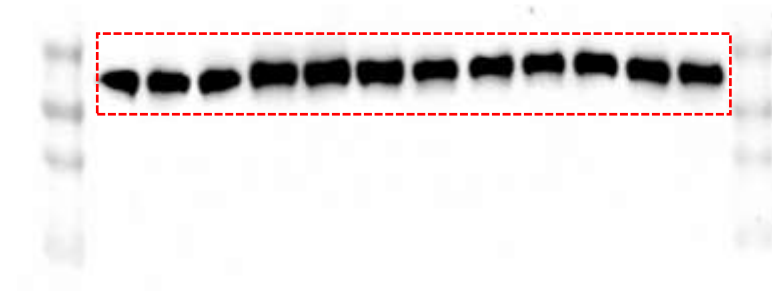

GSDME-N →

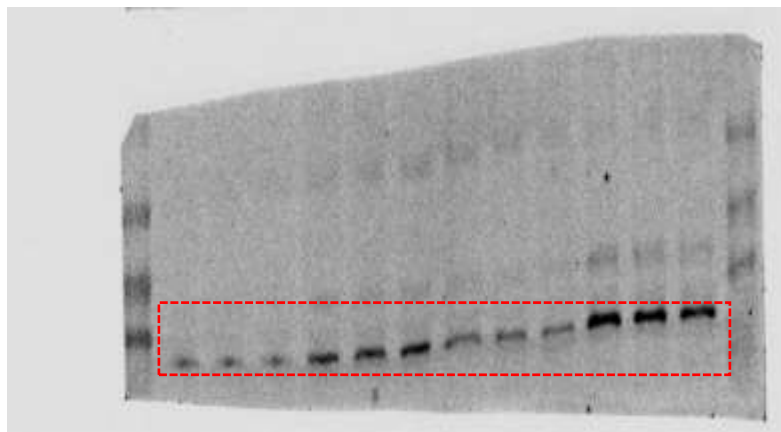

# Full and uncropped western blot

Fig 7J

FL-GSDME →

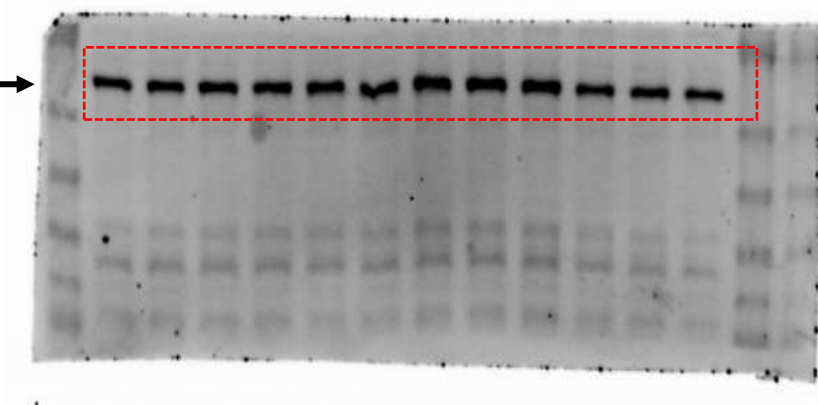

β-Actin →

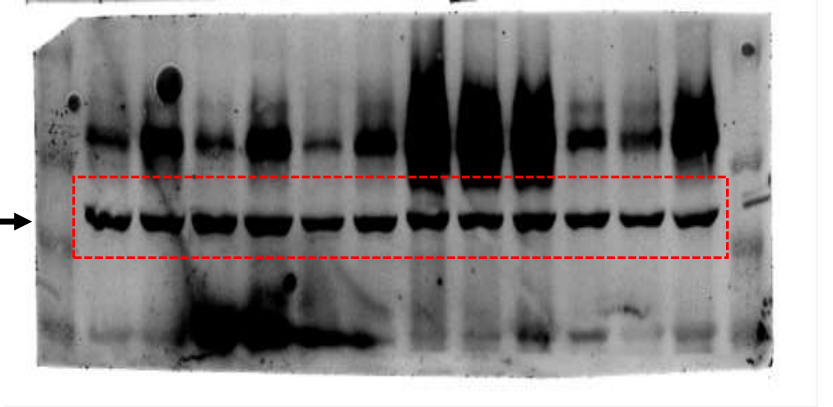

GSDME-N →

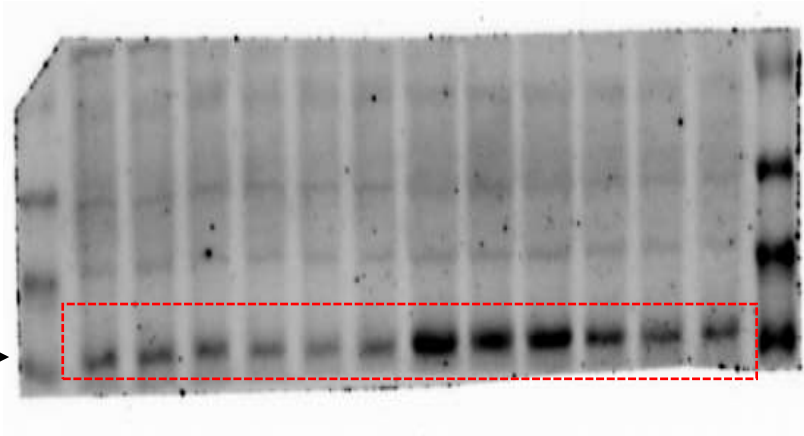

# Full and uncropped western blot

Fig 8F

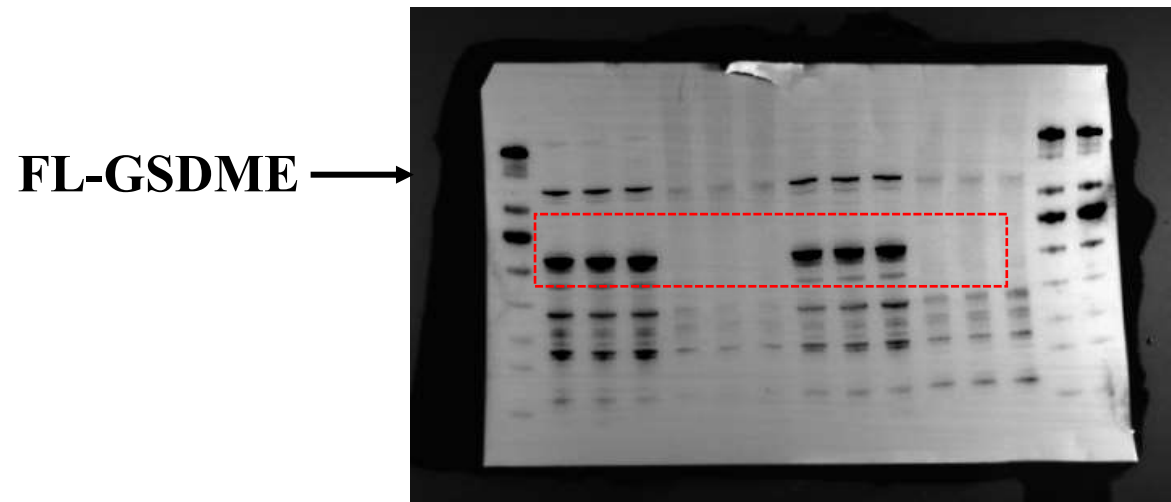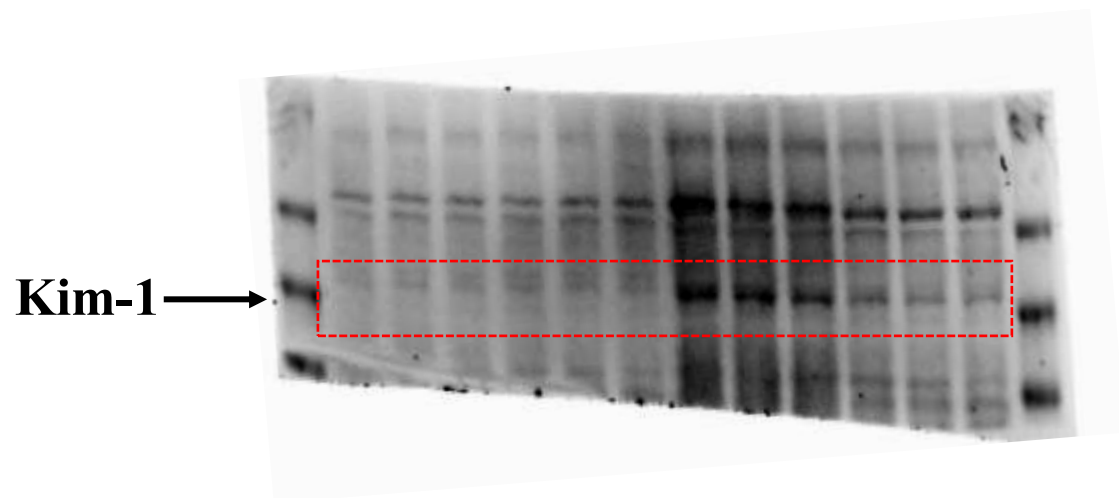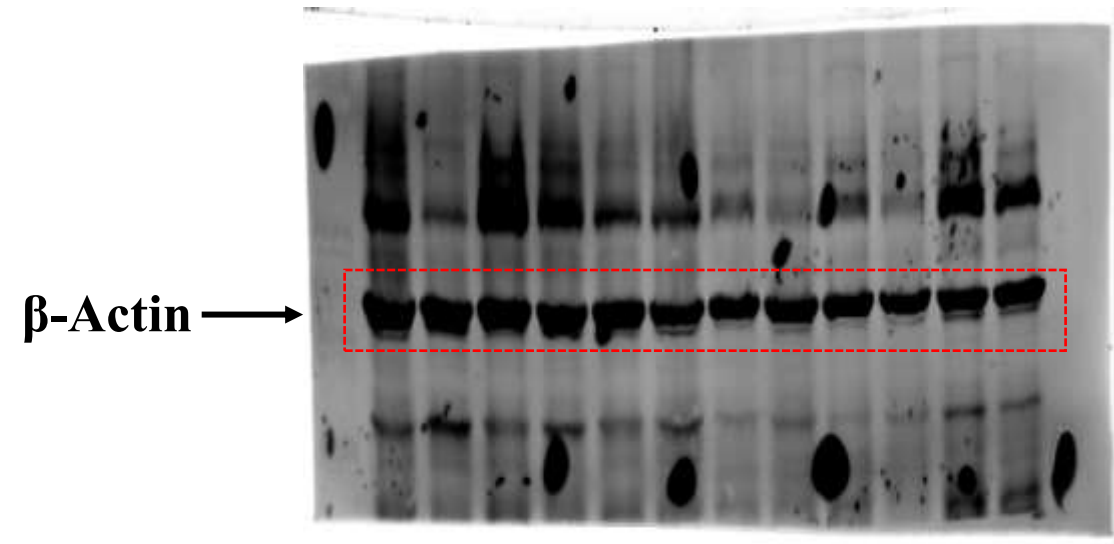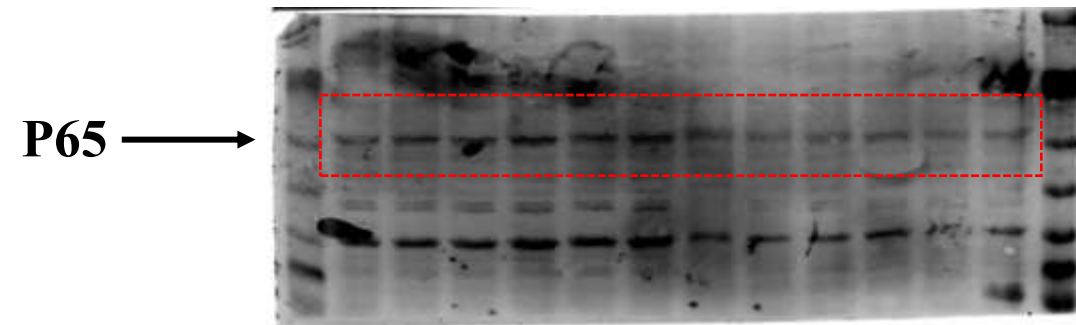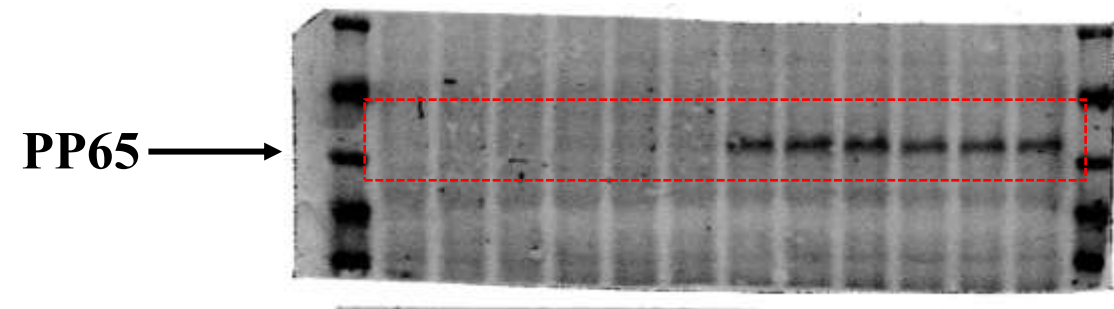

Supplement: Supplementary file 1 [file 0b883817e1235a5ced27655d.pdf]
